# Supplementary material
Source: PubMed Central journal article supplement (PMC6482070)
Supplement: NIHMS1522583-supplement-1.pdf [file NIHMS1522583-supplement-1.pdf]

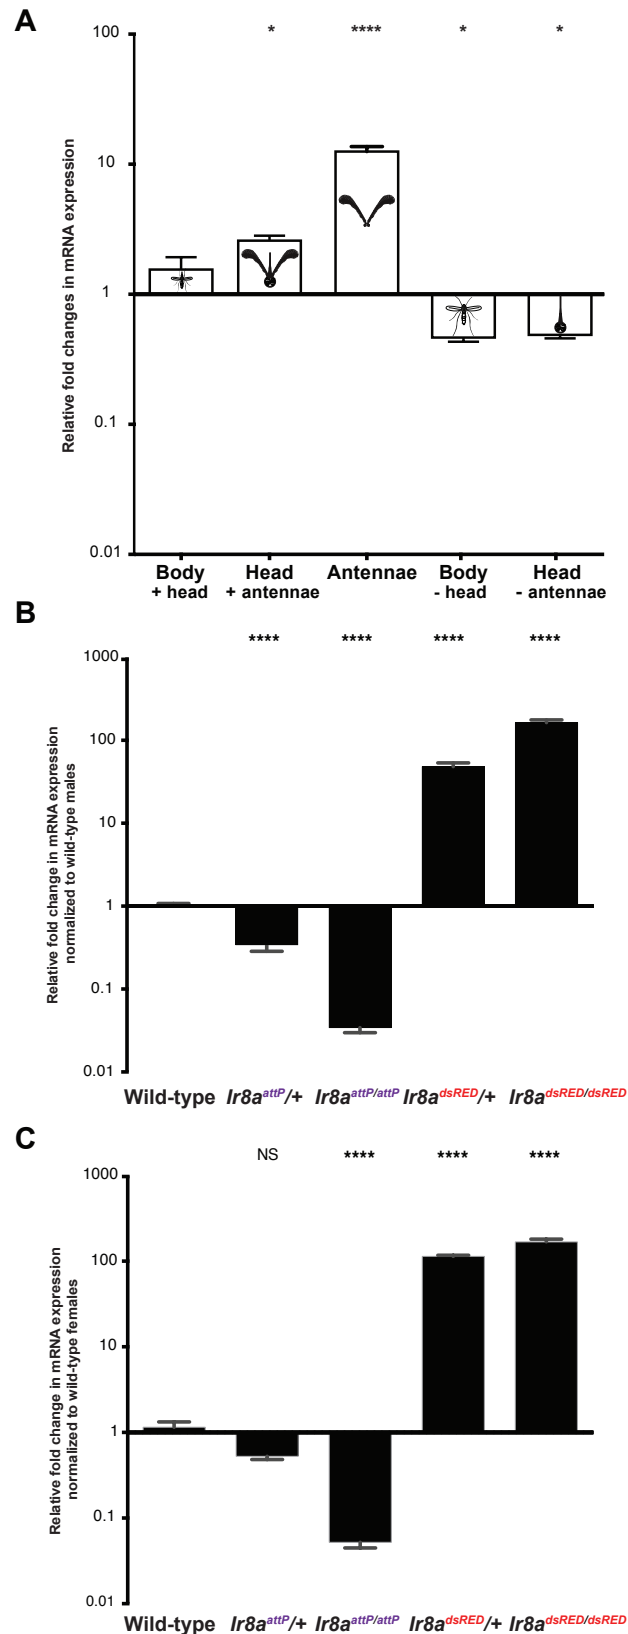

**Figure S1: Quantification of *Ir8a* mRNA expression. Related to Figure 1.**

(A) Quantitative RT-PCR analysis of *Ir8a* mRNA expression in wild-type female mosquito tissues. Bar plots represent the mean and standard error. Samples marked with asterisks are significantly different from an intact female by Mann-Whitney U test ( $p < 0.0001$ ). (B) Relative fold change in mRNA expression normalized to wild-type males ( $p < 0.0001$ ) and (C) females *Ae. aegypti* mosquitoes ( $p < 0.0001$ ). Bar plots represent the mean and standard error. Data was analyzed by Mann-Whitney U test. Genotypes marked with asterisks are significantly different from wild-type controls.

**A**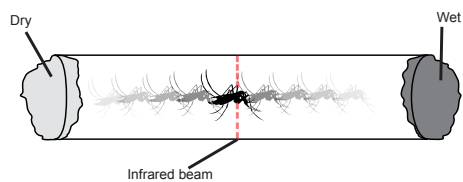**B**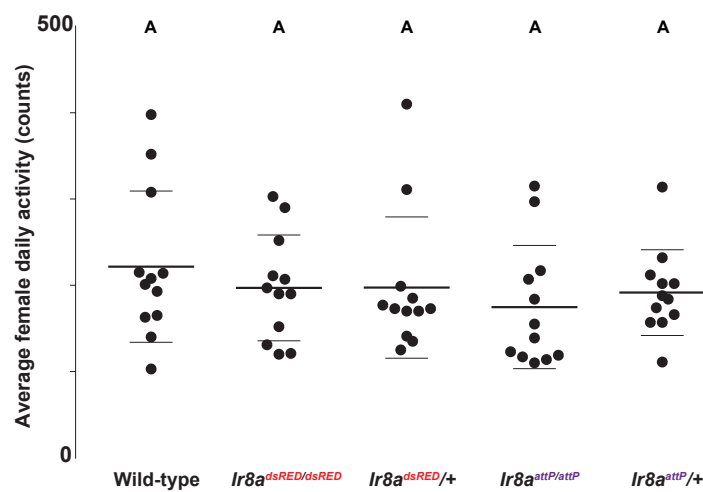**C**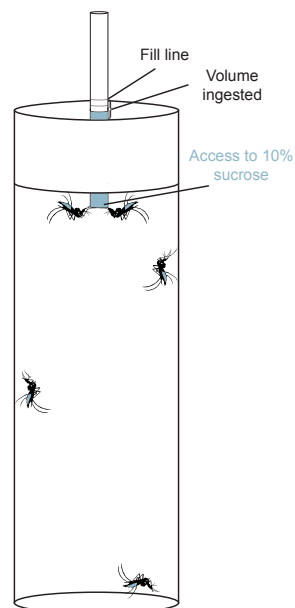**D**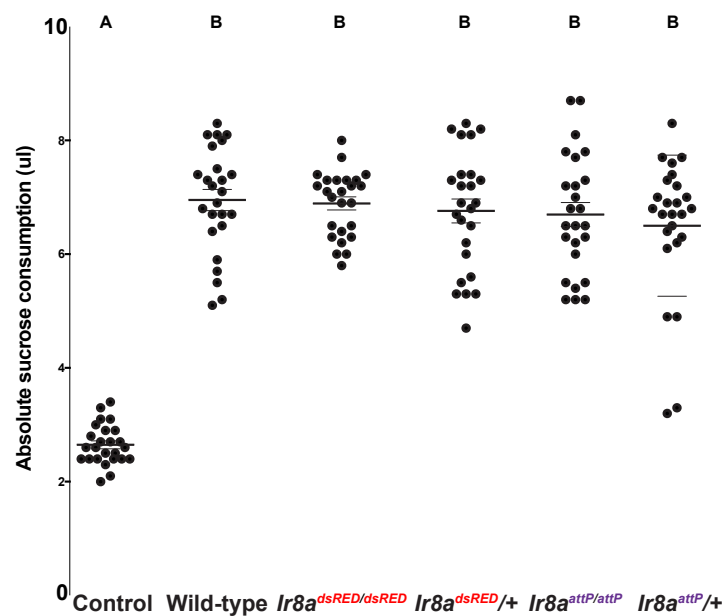**E**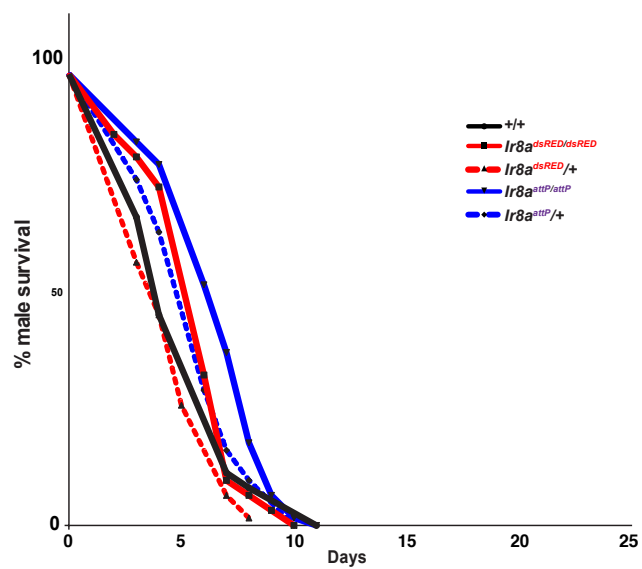**F**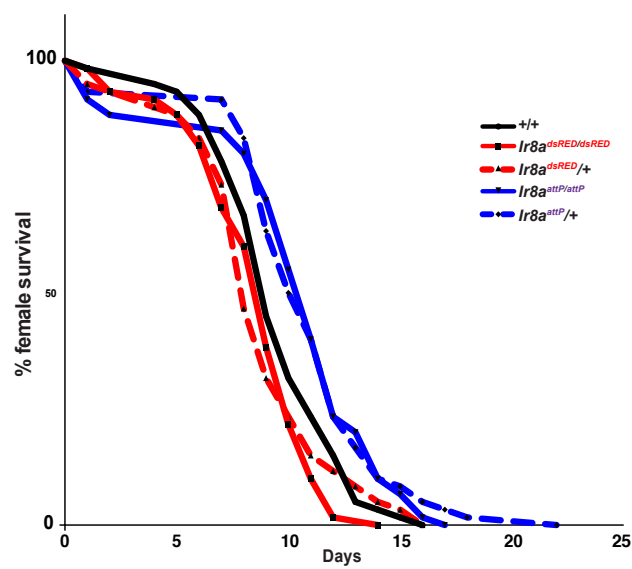

**Figure S2. Assessing locomotor activity, survival, and sugar-feeding behavior in *Ir8a* mutants. Related to Figure 1.**

(A) Diagram of beam break assay to monitor mosquito locomotor activity. (B) Average daily locomotor activity of *Ir8a* mutants after 4 days of fasting measured by the number of infrared beam breaks (counts). On the dot plot, long lines represent the mean and short lines represent standard error. There were no statistical differences among genotypes ( $p = 0.6224$ ,  $n = 12-13$ ). (C) Diagram of Capillary Feeder (CAFÉ) assay to quantify feeding behavior in mosquitoes. (D) Cumulative sucrose consumption after 18 hours of sugar feeding ( $p = 0.9411$ ,  $n=25$ ). On the dot plot, long lines represent the mean and short lines represent standard error. Data was analyzed by one-way ANOVA, and genotypes marked with the same letters are not significantly different by post hoc Tukey's HSD test. (E) Percent survival of 300 females under sugar starvation (F) Survival of 300 males under sugar starvation. Data was analyzed using log rank test and Gehan-Wilcoxon test followed by pairwise log rank comparisons with Bonferroni correction (corrected significance threshold;  $p < 0.001$ ). Using this test, *Ir8a<sup>attP/attP</sup>* males lived significantly longer than wild-type and *Ir8a<sup>dsRED/+</sup>*. Whereas, *Ir8a<sup>attP/attP</sup>* female mosquitoes lived significantly longer than wild-type, *Ir8a<sup>dsRED/+</sup>*, and *Ir8a<sup>dsRED/dsRED</sup>* mosquitoes. There was no difference for any other pair of curves.

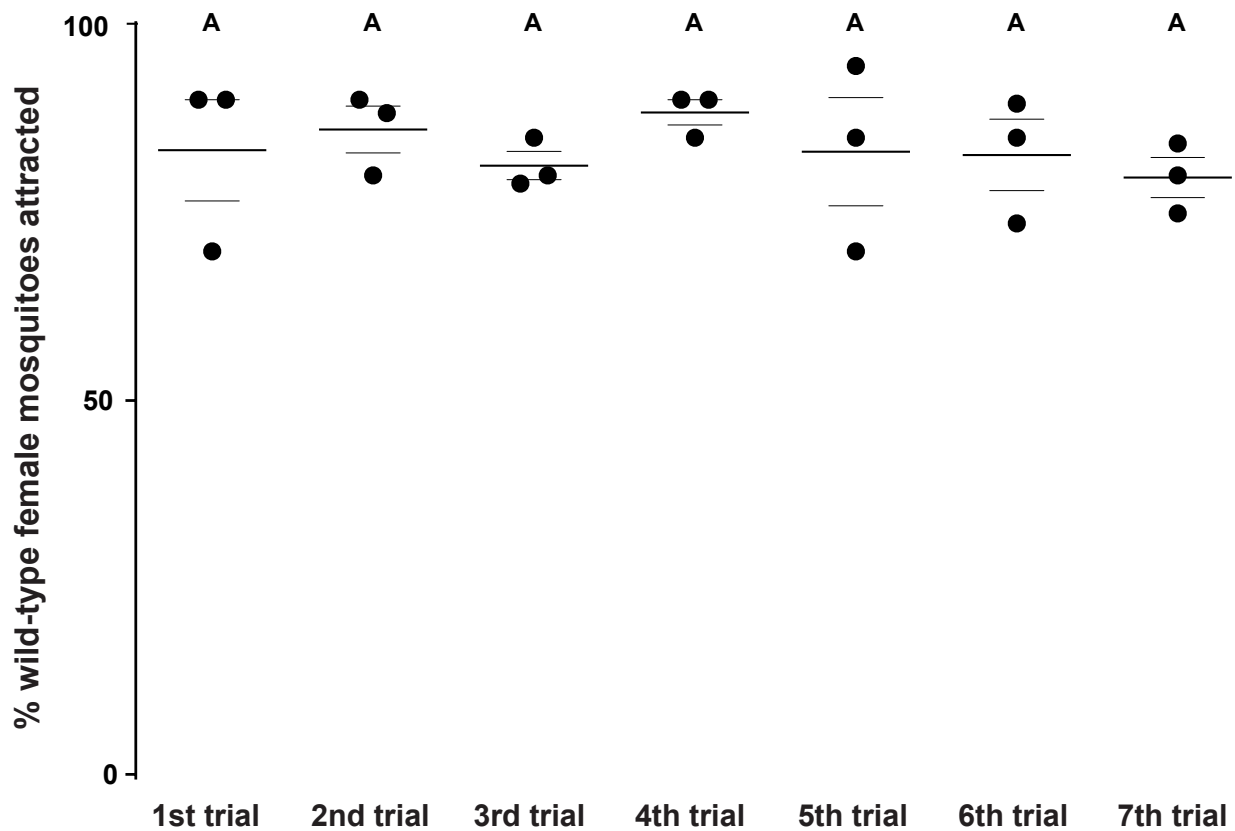

**Figure S3: Time course experiment showing mosquito attraction to human-scented nylon sleeves. Related to Figure 4.**

Percent wild-type mosquitoes attracted to human odor trapped on nylon sleeves (one-way ANOVA,  $n=3$ ). The dot plot represents the mean and standard error. Genotypes marked with the same letters are not significantly different ( $p = 0.8576$ ) by post hoc Tukey's HSD test.

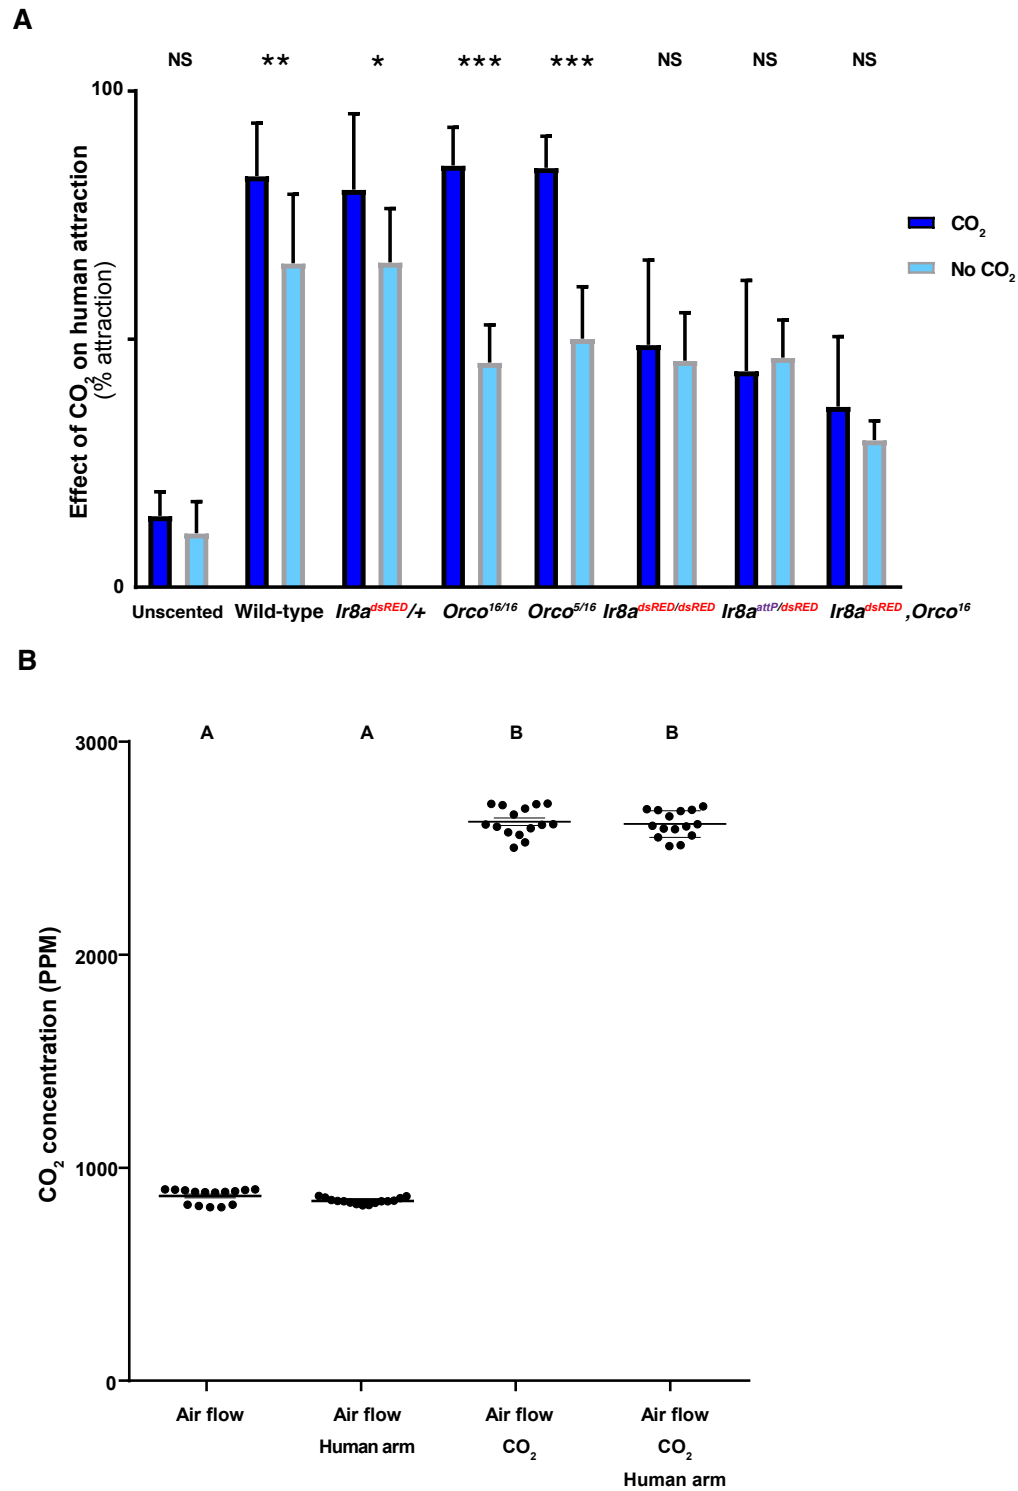

**Figure S4: The attraction of *Ir8a* mutants to human odor is not modulated by the presence of CO<sub>2</sub>. Related to Figure 4 & 5.**

(A) Comparison of female mosquitoes attracted to human odor scented nylon sleeve in the presence and absence of CO<sub>2</sub>. The bar plot represents the mean and standard error. Data compared is from figures 4C and 4F and analyzed by Two-way ANOVA, grouped column statistics comparing *Ir8a* and *orco* mutants. Genotypes marked with asterisk are significantly different ( $p < 0.001$ ).

(B) Measurement of Carbon dioxide concentration in the uniport olfactometer at different conditions with amprobe-100. The presence of a human arm in the assay did not significantly increase the concentration of CO<sub>2</sub>. The addition of CO<sub>2</sub> to the assay significantly increase the amount of CO<sub>2</sub> concentration detected. Data was analyzed by one-way ANOVA followed by Tukey's multiple comparison test ( $p < 0.0001$ ,  $n = 15$ ).

| Primer name                        | Sequence                                                                            |
|------------------------------------|-------------------------------------------------------------------------------------|
| IR8aExon2CRISPRF                   | GAAATTAATACGACTCACTATAG <b>GGGCGGACAAAATGGCGTATGTTT</b><br>TAGAGCTAGAAATAGC         |
| IR8aExon3CRISPRF                   | GAAATTAATACGACTCACTATAG <b>GGACATCTGTTCGACGATAACGTTT</b><br>TAGAGCTAGAAATAGC        |
| sgRNArev                           | AAAAGCACCGACTCGGTGCCACTTTTTCAAGTTGATAACGGACTAG<br>CCTTATTTTAACTTGCTATTTCTAGCTCTAAAC |
| infusionIR8LA_1                    | CCATGATTACGAATTCCGGGTGTTTGGTTCTCCAGATTG                                             |
| infusionIR8LA_2                    | ATGGCCATTCTGAATTCATAGCATGCGATGTAAGTGCAGGTAC                                         |
| infusion_IR8RA1                    | ATGTACAGAGCTCGAGCGGTATTCGACTACTACATTGTCTAC                                          |
| infusion_IR8RA2                    | ACTAGTACTTCTCGAGAGTACCGCTTGGTCGGTTTGATCTTC                                          |
| Ir8a <sup>dsRED</sup> ForLA3       | GTTGTTCATGAACGTGAACAACCGG                                                           |
| Ir8aexon4rev3                      | CGTTTCCTGTAGGCCCAAGGG                                                               |
| Ir8adsRedForLA1                    | GAACGTGAACAACCGGAAGTACCT                                                            |
| Ir8a_polyU_For                     | GCGGCCCAAGTAAGCAGTG                                                                 |
| Ir8adsRED_poly_rev2                | CAGCAAGTGACGTCAACCCTTC                                                              |
| Ir8a_afterRA_rev                   | AACCTCGGTAGTTCCAACGCG                                                               |
| SV40For1                           | CTGCATTCTAGTTGTGGTTTGTCC                                                            |
| Ir8aExon3for1                      | 6-FAM fluorescent modification- CGGATTCTCGGTTCTGGATG                                |
| Ir8aExon3rev2                      | CTCGGTAGTTCCAAGGCGAAAGTA                                                            |
| TaqMan Universal<br>forward primer | ATCAGTCCGATCGCTATGACAAG                                                             |
| TaqMan Universal<br>reverse primer | GGTTGTCAATACCTTTCGGCTTAC                                                            |

**Table S1: Table for oligonucleotides. Related to STAR methods.** Table listing the primers and their corresponding oligonucleotide sequences used in the study. Nucleotide sequence in bold letters indicate the CRISPR target sequence.

| Individual ID | Age | Race/Ethnicity | Sex |
|---------------|-----|----------------|-----|
| Subject 1     | 28  | Black/African  | M   |
| Subject 2     | 22  | Black          | M   |
| Subject 3     | 22  | White/Hispanic | F   |
| Subject 4     | 28  | White          | M   |
| Subject 5     | 23  | Hispanic       | M   |
| Subject 6     | 22  | White/Hispanic | F   |
| Subject 7     | 26  | Hispanic       | F   |
| Subject 8     | 25  | White          | M   |
| Subject 9     | 21  | Hispanic       | F   |
| Subject 10    | 21  | White          | F   |
| Subject 11    | 41  | White/Hispanic | M   |
| Subject 12    | 20  | Asian          | F   |
| Subject 13    | 24  | Hispanic       | M   |
| Subject 14    | 19  | White          | F   |
| Subject 15    | 21  | White          | F   |
| *Subject 16   | 24  | White/Hispanic | M   |
| *Subject 17   | 22  | White/Hispanic | M   |
| *Subject 18   | 41  | White          | M   |

**Table S2: Human subject details for behavioral assays. Related to Figure 3, 4 & 5.** Table showing the profile of the subjects used in the uniport olfactometer assay. Attraction to subject number 1 to 15 is shown in figure 4B. Subject number 1 was used exclusively to attract mosquitoes in host-seeking assays besides the uniport experiment represented in figure 4B. Subject 1 was used to control for individual differences that humans subjects present to mosquitoes. Asterisks indicate excluded subject. Subject number 16 to 18 were excluded from the experimental because they withdrew from the experiment or less than 20% of mosquitoes were attracted to them.
